# Supplementary material for: Accuracy of Anorectal Manometry to Detect the Rectoanal Inhibitory Reflex in Children: Awake Versus Under General Anesthesia
Source: PubMed Central journal article supplement (PMC10171289; doi:10.1097/mpg.0000000000003779), 2023-04-10

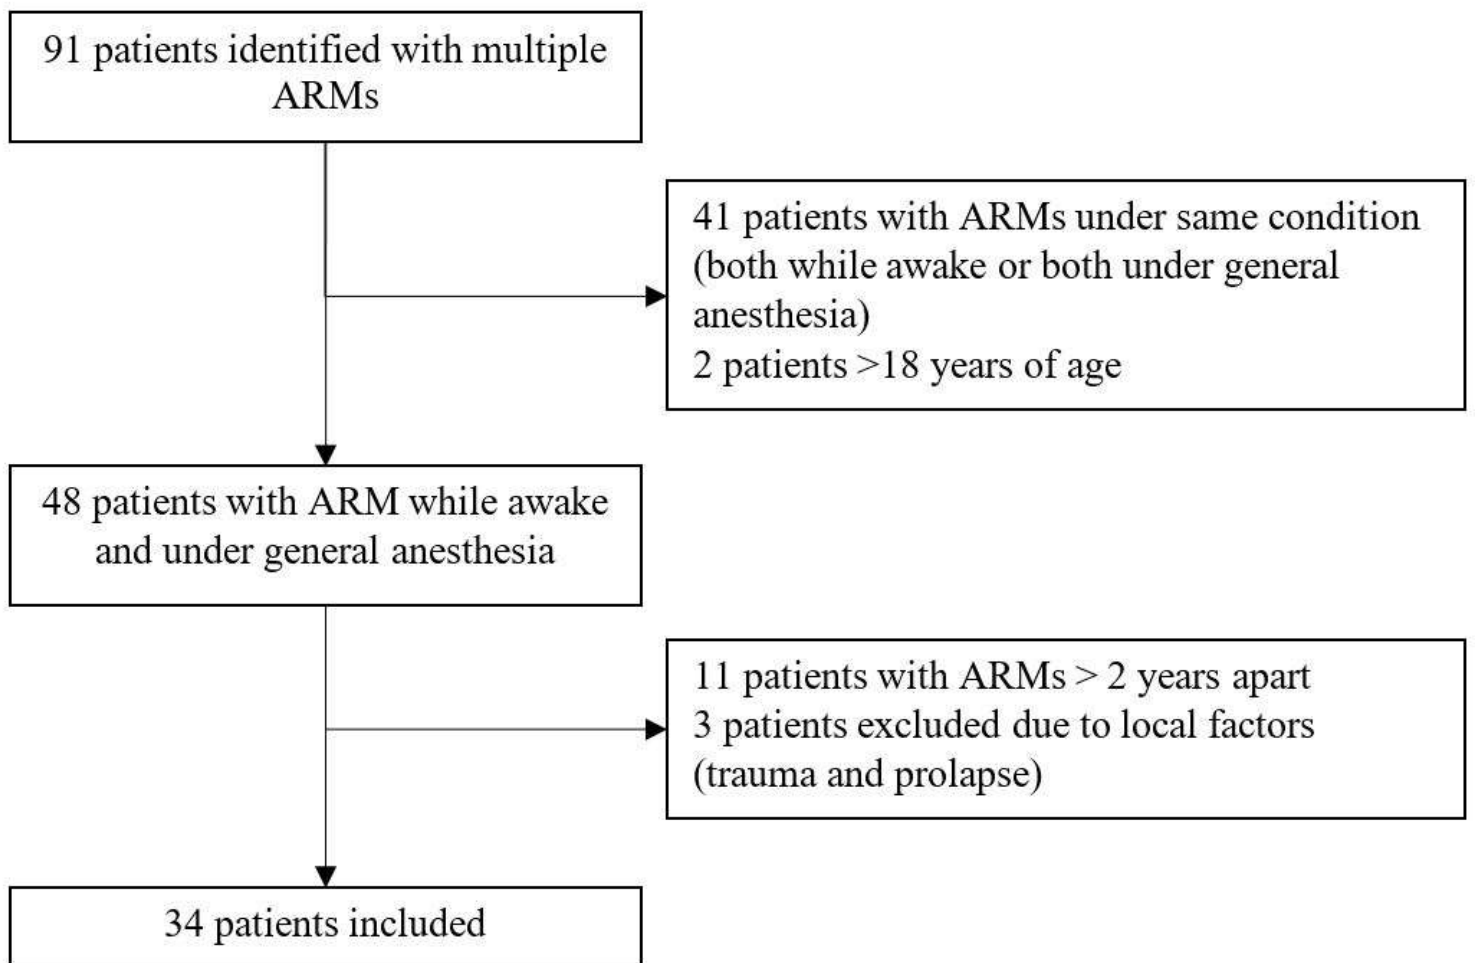

Supplement: mpg-76-731-s002.pdf [file mpg-76-731-s002.pdf]
